# Supplementary material for: Comprehensive analysis of multiprotein bridging factor 1 family genes and SlMBF1c negatively regulate the resistance to Botrytis cinerea in tomato
Source: BMC Plant Biol. 2019 Oct 21;19:437. doi: 10.1186/s12870-019-2029-y (PMC6805566; doi:10.1186/s12870-019-2029-y)
Supplement: Supplementary file 1 — Additional file 1: Table S1. Molecular properties of SlMBF1 gene family in tomato. [file 12870_2019_2029_MOESM1_ESM.xlsx]

## Sheet: Supplemental Table 1.
Supplemental Table 1. Molecular properties of SlMBF1 gene family in tomato
Gene name	Gene ID	Chromosome location	Orientation	Location	Protein size (aa)	PI	Molecular weight (Da)
SlMBF1a	Solyc10g007350.3.1	ch10	﹣	1730728-1735001	139	9.95	15.335
SlMBF1b	Solyc12g014290.2.1	ch12	﹢	5099923-5102916	139	10.04	15.272
SlMBF1c	Solyc07g062400.3.1	ch07	﹣	65291849-65294317	140	10.09	15.403
SlMBF1d	Solyc09g055470.1.1	ch09	﹢	41365973-41366392	139	9.95	15.353
SlER24	Solyc01g104740.3.1	ch01	﹣	93020068-93020508	146	10.11	16.033
